# Supplementary material for: Solution-processed high-performance p-channel copper tin sulfide thin-film transistors
Source: Royal Society of Chemistry journal article supplement (doi:10.1039/d1tc01575c), 2021-01-01
Supplement: d1tc01575c1.pdf [file d1tc01575c1.pdf]

## Solution Processed High-Performance of p-Channel Copper-Tin-Sulphur Thin-Film Transistor

Narendra Naik Mude, Ravindra Naik Bukke, and Jin Jang\*

Advanced Display Research Center, Department of Information Display,  
Kyung Hee University, Hoegi-dong, Dongdaemun-gu, Seoul 130-701, South  
Korea

Corresponding Author: Jin Jang

\*Email: [jjang@khu.ac.kr](mailto:jjang@khu.ac.kr) †

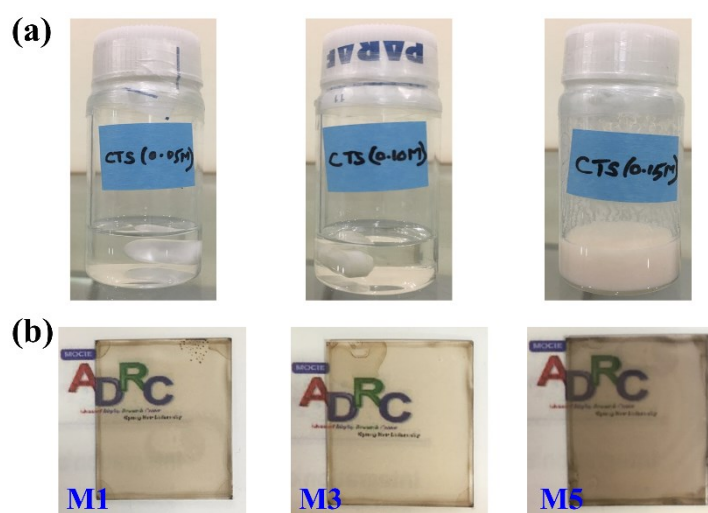

**Figure S1.** The optical photograph of (a) CTS precursor solutions and (b) thin-films using a different precursor solution concentration.

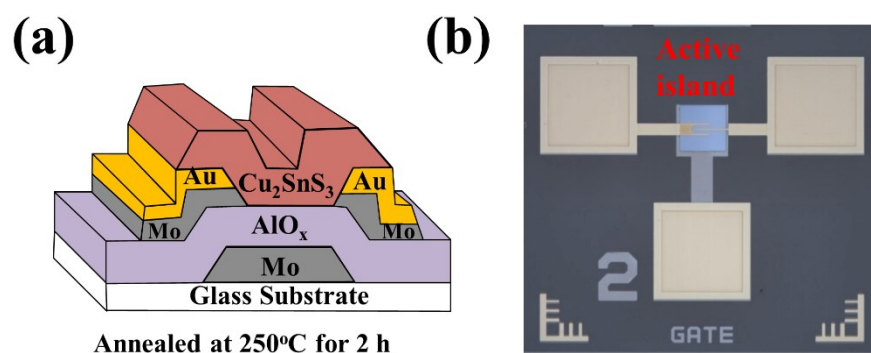

**Figure S2.** Schematic and optical properties of CTS TFT. (a) The schematic cross-sectional view of a bottom-gate, bottom-contact (BGBC) CTS TFT. (b) Optical photograph of the fabricated CTS TFT, with channel width and length of 100 and 10 μm, respectively. A clear active island can be seen.

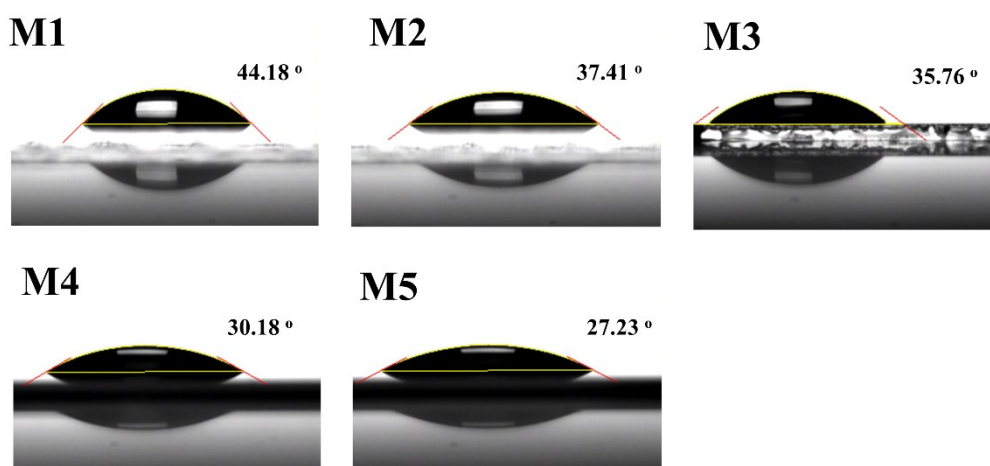

**Figure S3.** Water contact angles of the CTS films with different concentration (M1 = 0.05 M, M2 = 0.075 M, M3 = 0.10 M, M4 = 0.125 M, and M5 = 0.15 M).

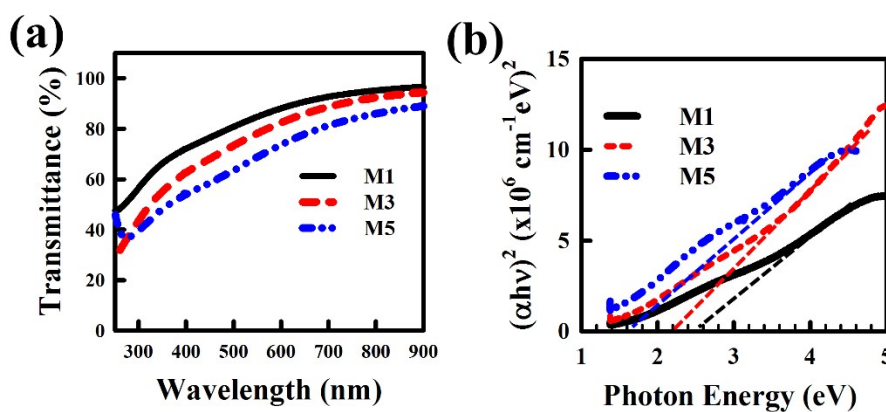

**Figure S4.** Optical properties of CTS thin films. (c) Transmittance and (d) optical bandgap. The bandgaps of CTS thin-films (M1, M3 and M5) are 2.65, 2.30, and 1.85 eV, respectively.

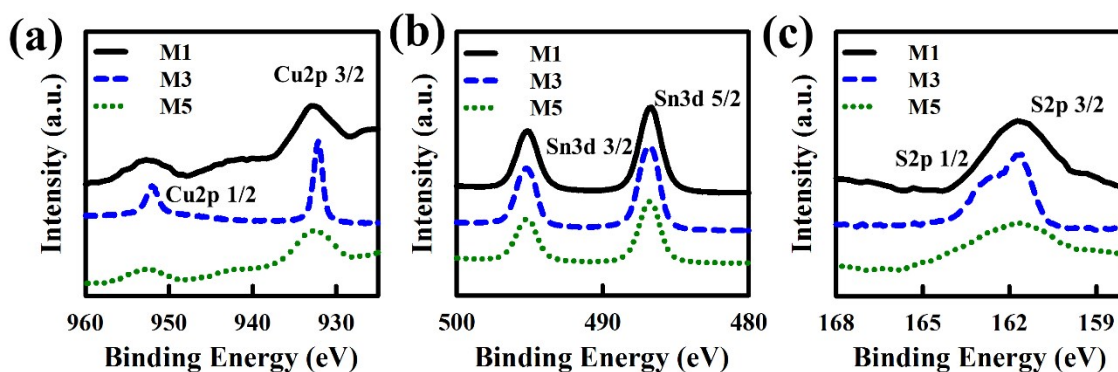

**Figure S5.** The XPS binding energy peaks for the (a) Cu2p, (b) Sn3d, and (c) S2p of CTS (M1, M3, and M5) films.

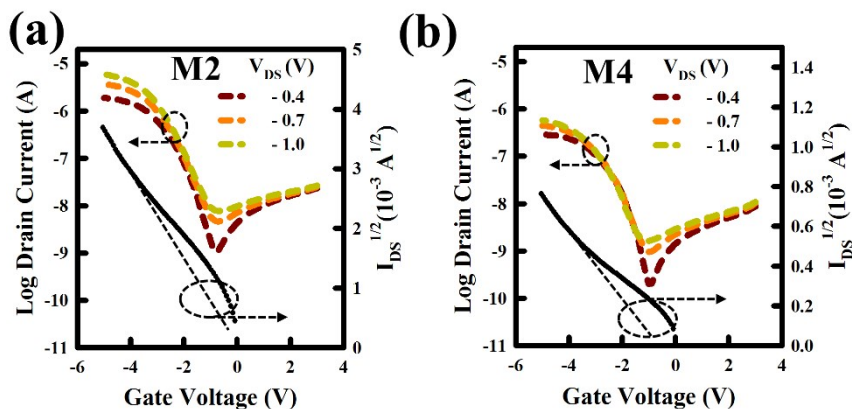

**Figure S6.** The electrical properties of p-type CTS TFTs. The transfer curves of CTS TFTs with different precursor solution concentrations of (a) M2=0.075 M and (b) M4=0.125 M. The  $I_{DS}^{1/2}$  vs.  $V_{GS}$  curves of CTS TFTs, respectively. The mobility was obtained from the linear part of the  $(I_{DS})^{1/2}$  vs.  $V_{GS}$  curve. The transfer curves of the CTS TFTs were measured at drain voltage ( $V_{DS}$ ) = -(0.4, 0.7, and 1) V, by sweeping gate voltage ( $V_{GS}$ ) from +2 to -5 V. All the TFTs have the channel length (L) and width (W) of 10 and 100  $\mu\text{m}$ , respectively.

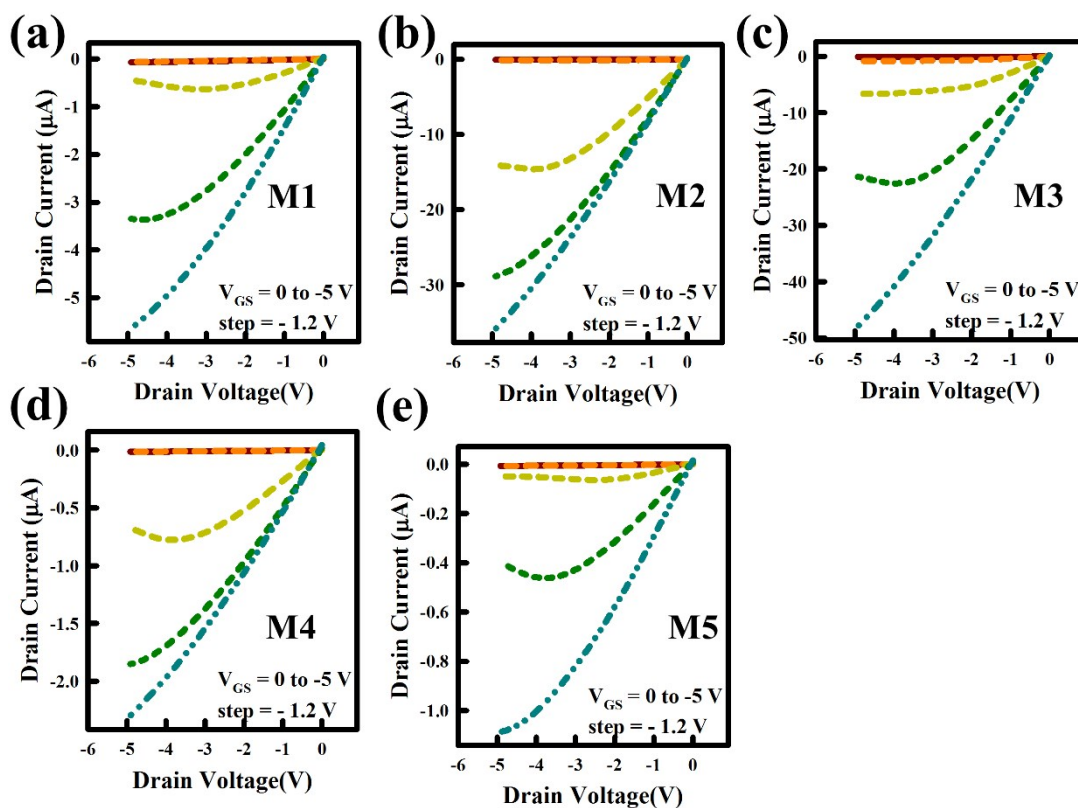

**Figure S7.** The output characteristics of the p-type CTS TFTs with different precursor solution concentrations. Output curves of all the CTS TFTs measured by applying  $V_{GS}$  from 0 to -5 V with a step of -1.2 V. All the TFTs have the channel length (L) and width (W) of 10 and 100  $\mu\text{m}$ , respectively.

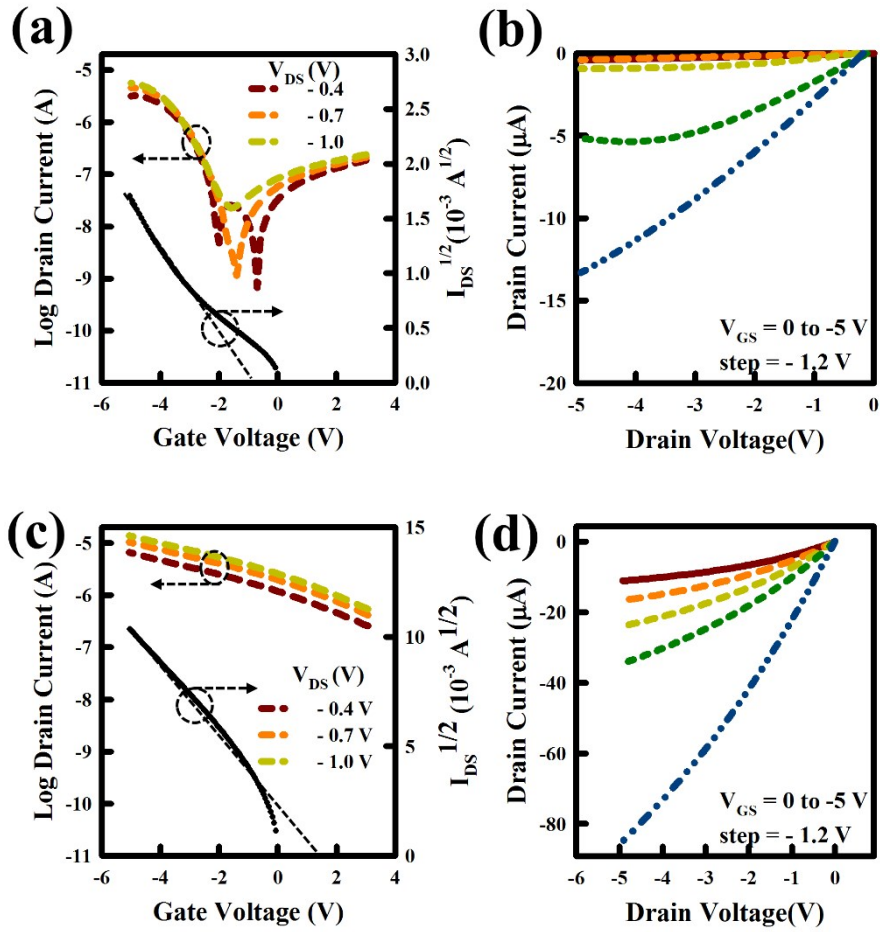

**Figure S8.** The electrical properties of the p-type CTS TFT annealed at 200 and 300°C. (a) The transfer curve and  $I_{DS}^{1/2}$  vs.  $V_{GS}$  curves of CTS TFT. (b) Output curves of the CTS TFT measured by applying  $V_{GS}$  from 0 to -5 V with a step of -1.2 V. (c) Transfer curve and  $I_{DS}^{1/2}$  vs.  $V_{GS}$  curves and (d) output curves of the CTS TFT annealed at 300°C. The transfer curves of CTS TFTs were measured at drain voltage ( $V_{DS}$ ) = -(0.4, 0.7, and 1.0) V, by sweeping gate voltage ( $V_{GS}$ ) from +3 to -5 V.

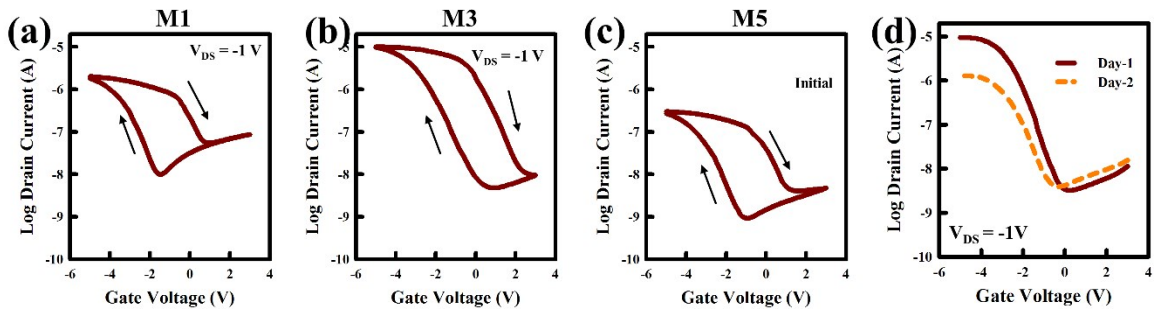

**Fig. S9.** Transfer curves with hysteresis characteristics for (a) M1, (b) M3 and (c) M5 CTS TFTs. (d) The comparison of transfer curves of CTS TFT measured at Day-1, Day-2, and Day-3, where the TFT were aged in air.

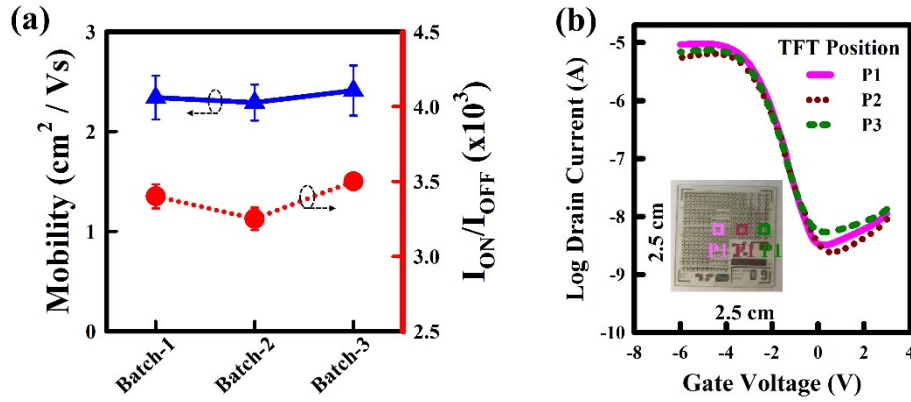

**Fig. S10** (a) Mobility  $I_{ON}/I_{OFF}$  of CTS TFT as a function of batches (Batch-1, Batch-2, and Batch-3). (b) Evaluation for the transfer curves of CTS TFT as a function of TFT position. Inset of (b) shows fabricated sample indicating different positions.

**Table S1.** The summary of the water contact angle data for the p-type CTS thin films with different precursor solution concentrations.

| Molar Concentration (M) | C.A (deg.) | $\gamma_w$ (mJm <sup>2</sup> ) | $\gamma_s$ (mJ/m <sup>2</sup> ) | W (mJ/m <sup>2</sup> ) |
|-------------------------|------------|--------------------------------|---------------------------------|------------------------|
| 0.050                   | 44.18      | 52.21                          | 38.36                           | 125.01                 |
| 0.075                   | 37.41      | 57.83                          | 46.32                           | 130.63                 |
| 0.100                   | 35.76      | 59.08                          | 48.44                           | 131.88                 |
| 0.125                   | 30.18      | 62.93                          | 54.54                           | 135.73                 |
| 0.150                   | 27.23      | 64.74                          | 57.11                           | 137.54                 |

**Table S2.** Hall effect measurement data of p-type CTS thin films with different precursor solution concentrations.

| Molar Concentration (M) | Resistivity ( $\Omega$ /cm) | Mobility (cm <sup>2</sup> /Vs) | Conductivity (10 <sup>-2</sup> S/cm) |
|-------------------------|-----------------------------|--------------------------------|--------------------------------------|
| 0.050                   | 0.85                        | 4.02                           | 0.77                                 |
| 0.075                   | 0.75                        | 5.05                           | 1.22                                 |
| 0.100                   | 0.61                        | 9.81                           | 4.30                                 |
| 0.125                   | 0.55                        | 5.10                           | 3.02                                 |
| 0.150                   | 0.41                        | 3.57                           | 2.21                                 |

**Table S3.** The summary of the electrical properties of p-type CTS TFTs with different precursor solution concentrations.

| Concentration<br>(M) | $\mu_{FE}$<br>( $\text{cm}^2\text{V}^{-1}\text{s}^{-1}$ ) | $V_{TH}$<br>(V) | SS<br>( $\text{mV dec}^{-1}$ ) | $N_{it}$<br>( $10^{12} \text{ cm}^{-2}$ ) |
|----------------------|-----------------------------------------------------------|-----------------|--------------------------------|-------------------------------------------|
| 0.050                | 0.24                                                      | -1.65           | 903                            | 7.09                                      |
| 0.075                | 1.68                                                      | -1.25           | 855                            | 6.69                                      |
| 0.100                | 2.43                                                      | -0.53           | 664                            | 5.05                                      |
| 0.125                | 0.11                                                      | -0.71           | 911                            | 7.16                                      |
| 0.150                | 0.07                                                      | -0.82           | 921                            | 7.24                                      |

**Table S4.** The summary of the device performances of the p-type TFTs reported.

| Method           | Channel           | Annealing<br>temp. °C) | $\mu_{FE}$<br>( $\text{cm}^2 \text{ V}^{-1} \text{ s}^{-1}$ ) | $I_{on}/I_{off}$      | Year <sup>ref</sup> |
|------------------|-------------------|------------------------|---------------------------------------------------------------|-----------------------|---------------------|
| Spin coating     | SnO               | 450                    | 0.13                                                          | 85                    | 2012 <sup>1</sup>   |
| Spin coating     | Cu <sub>2</sub> O | 700                    | 0.16                                                          | $\sim 10^2$           | 2013 <sup>2</sup>   |
| Spray coating    | Cu <sub>2</sub> O | 275                    | $10^{-4}$ – $10^{-3}$                                         | $1 \times 10^{-2}$    | 2013 <sup>3</sup>   |
| Spin coating     | CuSCN             | 80                     | $10^{-3}$ – $10^{-2}$                                         | $\sim 10^4$           | 2013 <sup>4</sup>   |
| Spin coating     | NiO               | 500                    | 0.14                                                          | --                    | 2014 <sup>5</sup>   |
| Spin coating     | Cu <sub>2</sub> O | 600                    | 0.29                                                          | $\sim 10^4$           | 2015 <sup>6</sup>   |
| Spin coating     | CuO               | 500                    | 0.01                                                          | $\sim 10^3$           | 2016 <sup>7</sup>   |
| Spin coating     | NiO               | 250                    | 0.07                                                          | $\sim 10^4$           | 2016 <sup>8</sup>   |
| Ink-jet printing | CuI               | 60                     | 4.4                                                           | $10^{-1}$ – $10^{-2}$ | 2016 <sup>9</sup>   |
| Spin coating     | CuO               | 250                    | 0.32                                                          | $\sim 10^4$           | 2017 <sup>10</sup>  |
| Spin coating     | NiO               | 350                    | 0.01                                                          | 2                     | 2017 <sup>11</sup>  |
| Spin coating     | CuO               | 500                    | $2.83 \times 10^{-3}$                                         | $\sim 10^4$           | 2018 <sup>12</sup>  |
| Ink-jet printing | NiO               | 280                    | 0.78                                                          | $5.3 \times 10^4$     | 2018 <sup>13</sup>  |
| Spin coating     | CuI               | RT                     | 0.44                                                          | $10^2$                | 2018 <sup>14</sup>  |

## REFERENCES

- (1) K. Okamura, B. Nasr, R. A. Brand, H. Hahn, *J. Mater. Chem.*, 2012, **22**, 4607.
- (2) S. Y. Kim, C. H. Ahn, J. H. Lee, Y. H. Kwon, S. Hwang, J. Y. Lee and H. K. Cho, *ACS Appl. Mater. Interfaces*, 2013, **5**, 2417.
- (3) P. Pattanasattayavong, S. Thomas, G. Adamopoulos, M. A. McLachlan, T. D. Anthopoulos, *Appl. Phys. Lett.*, 2013, **102**, 163505.
- (4) P. Pattanasattayavong, N. Y. Gross, K. Zhao, G. O.N. Ndjawa, J. Li , F. Yan, B. C. O'Regan, A. Amassian and T. D. Anthopoulos, *Adv. Mater.*, 2013, **25**, 1504.
- (5) S. Liu, R. Liu, Y. Chen, S. Ho, J. H. Kim and F. So, *Chem. Mater.*, 2014, **26**, 4528.
- (6) J. Yu, G. Liu, A. Liu, Y. Meng, B. Shin and F. Shan, *J. Mater. Chem., C*, 2015, **3**, 9509.
- (7) J. Jang, S. Chung, H. Kang, V. Subramanian, *Thin Solid Films*, 2016, **600**, 157.
- (8) A. Liu, G. Liu, H. Zhu, B. Shin, E. Fortunato, R. Martins and F. Shan, *Appl. Phys. Lett.*, 2016, **108**, 233506.
- (9) C. H. Choi, J. Y. Gorecki, Z. Fang, M. Allen, S. Li, L. Yu Lin, C. C. Cheng and C. H. Chang *J. Mater. Chem. C*, 2016, **4**, 10309.
- (10) A. Liu, S. Nie, G. Liu, H. Zhu, C. Zhu, B. Shin, E. Fortunato, R. Martins and F. Shan, *J. Mater. Chem. C*, 2017, **5**, 2524.
- (11) Y. Li, C. Liu, G. Wang and Y. Pei, *Semicond. Sci. Technol.*, 2017, **32**, 085004.
- (12) T. S. Jung, H. Lee, S. P. Park, H. J. Kim, J. H. Lee, D. Kim and H. J. Kim, *ACS Appl. Mater. Interfaces*, 2018, **10**, 32337.
- (13) H. Hu, J. Zhu, M. Chen, T. Guo, F. Li, *Appl. Phys. Lett.*, 2018, **441**, 295.
- (14) A. Liu, H. Zhu, W. T. Park, S. J. Kang, Y. Xu, M. G. Kim and Y. Y. Noh, *Adv. Mater.*, 2018, **30**, 1802379.
